# Supplementary material for: Spatial-Temporal Variations of Water Quality and Its Relationship to Land Use and Land Cover in Beijing, China
Source: Int J Environ Res Public Health. 2016 Apr 27;13(5):449. doi: 10.3390/ijerph13050449 (PMC4881074; doi:10.3390/ijerph13050449)
Supplement: Supplementary File 1 [file ijerph-13-00449-s001.xlsx]

## Sheet: Sheet1
forest	100	200	300	400	500	600	800	1000	1200	1500	2000
S1	43.9446	54.8686	61.9806	69.4195	73.3958	77.1587	81.9425	81.4772	78.3134	80.8018	82.6542
S2	76.7025	75.9874	78.7274	81.0636	82.6004	83.0639	82.6097	82.337	83.1415	85.5682	87.4724
S3	0	0	0.367985	3.00926	4.59877	4.06097	3.32324	3.48505	4.51483	4.76759	4.29028
S4	34.4371	49.2537	55.425	58.1997	54.4823	49.2907	40.7798	35.5299	32.501	28.8881	24.6458
S5	0	0	0	0	0	0	0	0	0.50355	0.923069	2.55373
S6	0	0	0	0	0	0	0	0	0.012452	0.973215	2.0283
S7	0.45977	3.50877	4.73098	5.45995	4.96255	4.46204	3.81847	5.03406	6.27251	7.55074	8.21392
S8	15.6055	16.0436	13.8265	13.6619	12.7036	12.4171	12.5088	11.6354	10.5833	9.83801	10.0885
S9	1.85185	4.69483	3.81847	2.61019	2.04499	2.10986	3.4589	4.95669	4.7076	4.8892	4.92752
S10	0	0	0	0	0	0	0.613642	0	0.0897267	1.44876	1.42807
S11	0	0	0	0	0	0.145349	0.56899	0.602721	0.744255	1.32384	1.65366
S12	32.6958	30.2097	28.1324	25.1192	22.5551	19.7767	16.8077	14.3949	12.6065	10.4622	9.14999
S13	0	0	0.095602	1.21735	4.55967	6.82715	13.0329	15.8379	18.6693	18.3409	16.4262
grass	100	200	300	400	500	600	800	1000	1200	1500	2000
S1	0	0	0	0	0	0	0	0	0	0	0
S2	0	0	0.569801	1.36187	2.96367	4.51874	6.81219	8.11177	9.20703	8.85489	8.38672
S3	0	0	0	0	0	0	0	0	0	0	0
S4	0	0	0	0	0	0	0	0	0	0.109862	0.16088
S5	0	0	0	0	0	0	0	0.729443	2.3155	4.5096	5.43324
S6	0	0	0	0	0	0	0.330189	0.684017	0.535425	0.689002	0.522014
S7	0	0.928793	1.76252	2.67686	3.18352	3.23857	3.5446	4.51902	4.08645	3.10458	5.40042
S8	1.49813	1.86916	1.1236	0.972763	1.64474	1.66365	1.93533	3.38019	5.21079	7.56129	7.15415
S9	0	0	0.28169	0.577664	0.755073	0.727537	1.39777	1.87762	1.57895	1.50148	1.39648
S10	0	2.89193	5.56062	8.2397	6.89655	6.52945	6.98607	8.16178	8.10528	8.78755	8.40973
S11	0	3.44288	9.68956	10.689	8.04543	6.17733	4.81271	5.0973	5.02372	3.83802	2.28322
S12	0	0	0	0	0	0	0	0	0.596125	0.771208	0.533639
S13	0	0	0	0	0	0	0	0	0	0	0
water	100	200	300	400	500	600	800	1000	1200	1500	2000
S1	21.1073	13.6012	8.90347	6.85019	6.18267	5.02894	4.62046	4.95165	6.24066	5.31532	4.59014
S2	0	0	0.379867	0.907912	1.24283	1.21234	1.10338	1.37172	1.17617	0.996503	0.843476
S3	54.8611	35.3659	23.6431	17.803	14.3056	12.433	10.0862	9.89446	10.8824	9.90783	7.88469
S4	28.4768	18.0597	13.2007	8.56967	7.84581	7.56243	8.41743	9.86007	10.5116	10.082	9.72547
S5	0	0	0	0	0	0	0	0	0	0.111454	0.06831
S6	8.01394	8.59375	7.51174	5	5.03529	4.60312	3.30189	2.68602	2.76429	2.44596	1.93514
S7	10.6897	10.2167	8.0705	5.22626	5.52434	4.89385	3.96714	3.17328	3.22941	3.24217	3.06639
S8	15.7303	11.3707	17.0412	15.1102	12.8759	13.4177	10.1251	8.73494	8.29499	8.29247	7.43336
S9	16.6667	10.3286	7.41784	5.26316	6.08778	7.74827	7.08363	6.18609	5.77694	5.28554	4.29034
S10	15.4882	10.0457	9.02461	7.05368	5.93103	5.81973	4.97994	5.08289	5.23404	5.43878	6.81418
S11	13.9286	10.9546	9.03104	7.53381	7.52485	7.5218	8.29777	7.92147	8.55428	7.96529	5.66608
S12	8.46994	7.83055	7.0922	7.15071	7.87854	7.27273	5.71066	7.01275	6.80958	6.49904	5.78026
S13	27	17.5466	12.4283	9.76096	8.2963	6.72526	6.39476	6.80581	6.21842	6.05841	6.96013
crop	100	200	300	400	500	600	800	1000	1200	1500	2000
S1	34.6021	27.6146	24.9297	19.9957	17.6893	15.533	11.9362	11.5594	12.9796	11.9219	10.4063
S2	21.147	13.1122	9.21177	8.30091	7.68005	7.71491	8.48325	8.30935	7.15399	5.75465	4.70318
S3	52.0833	52.439	49.1873	45.6439	43.3488	43.2178	45.7489	51.792	55.7349	58.7529	63.2153
S4	0	0	0	0	0	0	0	0	0	0.002817	0.179909
S5	0	0	0	0	0	0	0	0	0	0	0
S6	0	0	0	0	0	0	0	0	0	0	0
S7	23.3333	22.3426	23.3766	24.028	23.97	24.5172	24.5853	24.622	24.3945	25.7253	31.8493
S8	35.7053	42.0042	42.7903	44.2066	43.6717	41.3864	37.2748	37.5056	38.569	39.8538	43.2568
S9	71.9908	72.0396	72.9578	73.6414	69.9701	65.539	60.5781	59.5082	60.7937	60.7447	59.44
S10	66.2178	61.2887	54.2692	48.1898	45.7011	42.749	36.0397	28.3416	23.618	22.6893	18.368
S11	0	0	0	0	0	0	0.940413	2.80696	4.47949	4.92083	8.48374
S12	51.7304	50.9628	51.6155	53.3003	56.2714	60.1701	64.6644	64.6883	62.5053	60.588	64.6119
S13	72.7778	78.7785	78.84	77.3794	73.8107	72.2328	68.4122	65.4689	61.8894	61.9545	61.0423
imp	100	200	300	400	500	600	800	1000	1200	1500	2000
S1	0	3.24575	3.46767	3.137	2.29508	1.77279	1.15512	1.66722	2.00133	1.57357	2.04138
S2	2.15054	10.9005	11.301	8.81971	6.50096	4.99633	3.26217	2.57409	2.39029	1.75699	1.17446
S3	16.088	29.0142	37.5345	40.9512	43.7809	45.028	44.0329	36.4831	30.0509	27.6441	25.3615
S4	37.0861	32.6866	31.3743	33.2306	37.6115	42.9827	49.9388	53.6013	56.0942	60.2749	64.9264
S5	100	100	100	100	100	100	100	99.2706	96.9251	93.5071	91.9903
S6	91.9861	91.4063	92.4883	95	94.9647	95.3969	96.588	97.086	97.0448	96.3511	95.5339
S7	65.5172	63.3127	62.6469	63.5011	63.4207	63.9079	64.82	63.3715	62.5595	60.2855	52.4868
S8	14.357	13.2918	13.9201	17.7907	22.3841	25.3526	32.5781	34.6999	34.1624	33.9297	32.9786
S9	2.5463	4.06887	6.63536	8.36542	10.5238	12.4045	16.7259	19.24	20.7811	22.6378	26.7598
S10	18.1818	27.1436	33.7283	40.2414	44.092	47.374	54.4568	60.9522	64.9868	63.7731	66.8547
S11	86.0714	87.8978	87.7391	88.9032	89.7934	90.2737	88.4306	85.8217	82.7519	82.9532	81.6867
S12	7.10383	10.7831	12.3719	13.3663	11.7357	10.9622	11.0477	12.5531	16.852	21.2618	19.5036
S13	0.222222	3.67495	8.63608	11.6423	13.3333	14.2148	12.1601	11.8875	12.9234	12.6795	13.7456
